# Supplementary material for: Turning Good Intentions Into Actions by Using the Health Action Process Approach to Predict Adherence to Internet-Based Depression Prevention: Secondary Analysis of a Randomized Controlled Trial
Source: PubMed Central journal article supplement (PMC5785685; doi:10.2196/jmir.8814), 2018-01-11
Supplement: jmir_v20i1e9_app1.pdf [file jmir_v20i1e9_app1.pdf]

## Appendix Tables

Table 3. Means and standard deviations for the HAPA variables per item at baseline.

| <b>HAPA variables per item</b>                                                                                                                       | Mean | SD <sup>a</sup> | Range |
|------------------------------------------------------------------------------------------------------------------------------------------------------|------|-----------------|-------|
| <b>Motivational self-efficacy</b>                                                                                                                    |      |                 |       |
| I am confident that I am able to ...                                                                                                                 |      |                 |       |
| complete one module of the online training per week even if there might be problems.                                                                 | 3.66 | 0.48            | 3-4   |
| complete all six modules of the online training and the booster session four weeks after completion of the training even if there might be problems. | 3.62 | 0.49            | 3-4   |
| <b>Outcome expectancies</b>                                                                                                                          |      |                 |       |
| If I complete one module of the online training per week ...                                                                                         |      |                 |       |
| I will learn to cope with stress.                                                                                                                    | 3.29 | 0.57            | 1-4   |
| I will become more resilient in my everyday life.                                                                                                    | 3.14 | 0.60            | 1-4   |
| <b>Intention</b>                                                                                                                                     |      |                 |       |
| I intend to complete ...                                                                                                                             |      |                 |       |
| all six modules of the online training and the booster session four weeks after completing the training.                                             | 3.50 | 0.84            | 1-4   |
| <b>Planning</b>                                                                                                                                      |      |                 |       |
| I have already made detailed plans ...                                                                                                               |      |                 |       |
| when to complete the modules.                                                                                                                        | 2.25 | 1.07            | 1-4   |
| how often I will work on the modules during the week.                                                                                                | 2.30 | 1.04            | 1-4   |
| how to complete the modules despite my other obligations and interests.                                                                              | 2.62 | 0.98            | 1-4   |
| how to continue working on the modules even if something comes up.                                                                                   | 2.60 | 1.00            | 1-4   |
| <b>Maintenance self-efficacy</b>                                                                                                                     |      |                 |       |
| I am confident that I am able to complete one module of the online training per week ...                                                             |      |                 |       |
| even if I do not see positive effects immediately.                                                                                                   | 3.51 | 0.54            | 2-4   |
| even if I would like to do something else.                                                                                                           | 3.39 | 0.63            | 1-4   |
| even if I experience technical problems with the computer or with the internet.                                                                      | 3.37 | 0.64            | 2-4   |
| even if it is hard for me to do so.                                                                                                                  | 3.19 | 0.82            | 1-4   |
| <b>Recovery self-efficacy</b>                                                                                                                        |      |                 |       |
| I am confident that I can continue working on the training modules ...                                                                               |      |                 |       |
| even if I postpone my detailed plans several times.                                                                                                  | 3.42 | 0.62            | 1-4   |
| even if I am not able to pull myself together sometimes.                                                                                             | 3.46 | 0.61            | 1-4   |

even if I have not worked on a module for several days.

3.37 0.64 1-4

*Note.* <sup>a</sup>SD = standard deviation

Table 4. Correlation matrix of the HAPA variables with treatment adherence.

|                 | <b>Adh</b> | <b>Mot SE</b> | <b>Out Expt</b> | <b>Intent</b> | <b>Plan</b> | <b>Maint SE</b> | <b>Rec SE</b> |
|-----------------|------------|---------------|-----------------|---------------|-------------|-----------------|---------------|
| <b>Adh</b>      | 1          | .22*          | .11             | -.09          | .31**       | .17             | .15           |
| <b>Mot SE</b>   | .22*       | 1             | .16             | .04           | .18         | .45**           | .39**         |
| <b>Out Expt</b> | .11        | .16           | 1               | .14           | .35**       | .24*            | .11           |
| <b>Intent</b>   | -.09       | .04           | .14             | 1             | -.06        | .14             | .14           |
| <b>Plan</b>     | .31**      | .18           | .35**           | -.06          | 1           | .39**           | .21**         |
| <b>Maint SE</b> | .18        | .45**         | .24*            | .14           | .39**       | 1               | .59**         |
| <b>Rec SE</b>   | .15        | .39**         | .11             | .14           | .21*        | .59**           | 1             |

*Note.* \*P < .05, \*\*P < .01. Adh = Adherence, Mot SE = Motivational self-efficacy, Out Expt = Outcome expectancies, Intent = Intention, Plan = Planning, Maint SE = Maintenance self-efficacy, Rec SE = Recovery self-efficacy
